# Supplementary material for: Chemerin Regulates Epithelial Barrier Function of Mammary Glands in Dairy Cows
Source: MDPI journal article supplement (doi:10.3390/ani11113194), 2021-11-09
Supplement: s1 [file s1]

**Table S1.** Sequences of primers used for RT-PCR and quantitative RT-PCR (qRT-PCR)

| Gene                        | Accession No   |   | Sequences (5' - 3')    | Length (bp) | Efficiency <sup>C</sup> | (R <sup>2</sup> ) <sup>D</sup> |
|-----------------------------|----------------|---|------------------------|-------------|-------------------------|--------------------------------|
| <i>RN18S1</i> <sup>A</sup>  | NR_036642.1    | F | AGTACGCACGGCCGGTACAGT  | 130         | -                       | -                              |
|                             |                | R | CAGCGCCCCGTCGGCATGTATT |             |                         |                                |
| <i>GAK</i> <sup>B</sup>     | NM_001046084.2 | F | TCTGGGAAGTGGCAGAGAGT   | 294         | 1.85                    | 0.99                           |
|                             |                | R | CGGCACGTCTGGTAGAAGAT   |             |                         |                                |
| <i>VPS4A</i> <sup>B</sup>   | NM_001046615.1 | F | CAAAGCCAAGGAGAGCATTC   | 222         | 1.92                    | 0.97                           |
|                             |                | R | ATGTTGGGCTTCTCCATCAC   |             |                         |                                |
| <i>ACTB</i> <sup>B</sup>    | NM_173979.3    | F | GAATCCTGCGGCATTACGA    | 192         | 1.94                    | 0.99                           |
|                             |                | R | AGGGGGCGCGATGATCTTG    |             |                         |                                |
| <i>RARRES2</i> <sup>B</sup> | NM_001046020.2 | F | GTTTGTGAGGCTGGAGTTC    | 173         | 1.95                    | 0.99                           |
|                             |                | R | GAGTCTGTATGGGACAGTGC   |             |                         |                                |
| <i>CMKLR1</i> <sup>B</sup>  | NM_001145235.1 | F | CATCGTCGTTCTGGAGGAGT   | 169         | 2.00                    | 0.97                           |
|                             |                | R | GTTGAGGAACCAGACGGTGT   |             |                         |                                |
| <i>CCRL2</i> <sup>B</sup>   | NM_001075732.2 | F | CCAGGGGGATAAACAGTGGT   | 266         | 2.04                    | 0.98                           |
|                             |                | R | ATCTTGGGGTCGTATGGGGT   |             |                         |                                |
| <i>GPRI</i> <sup>B</sup>    | NM_001206545.1 | F | GGTCTCCTTGGTGTGTGCT    | 291         | 1.97                    | 0.98                           |
|                             |                | R | TAGCGGTCCAGGCTTATCAC   |             |                         |                                |
| <i>CD68</i>                 | NM_001045902.1 | F | AGGTTGGCTGTGTTCTTCTCT  | 183         | 1.92                    | 0.99                           |
|                             |                | R | GGTTCTGTGGCTCTTGGTAGT  |             |                         |                                |
| <i>CSN1S1</i>               | NM_181029.2    | F | TGTCTTGTGGCTGTTGCTCT   | 76          | 1.94                    | 0.97                           |
|                             |                | R | CATTGAGGACTTCTTGAGGGA  |             |                         |                                |

A: 18S rRNA was not used for qRT-PCR. Thus, primer efficiency and R<sup>2</sup> were not determined.

B: These primer pairs were incorporated from Suzuki *et al.*, 2016

C: Primer efficiency =  $10^{(-1/\text{slope})}$ ; the slope was calculated from a standard curve constructed using a 5 points dilution series of pooled cDNA

D: R<sup>2</sup> represents the coefficient of determination for the standard curve.
